# Supplementary material
Source: PubMed Central journal article supplement (PMC7368333)
Supplement: pnas.2001998117.sapp.pdf [file pnas.2001998117.sapp.pdf]

# PNAS

[www.pnas.org](http://www.pnas.org)

Supplementary Information for

***MSH1* is required for maintenance of the low mutation rates in plant mitochondrial and plastid genomes**

Zhiqiang Wu, Gus Waneka, Amanda K. Broz, Connor R. King, Daniel B. Sloan

Daniel B. Sloan

Email: [db Sloan@rams.colostate.edu](mailto:db Sloan@rams.colostate.edu)

**This PDF file includes:**

Supplementary text  
Figures S1 to S7  
Tables S1 to S11  
Legends for Dataset S1  
SI References

**Other supplementary materials for this manuscript include the following:**

Dataset S1

## Supplementary Information Text

### **Estimating noise threshold of duplex sequencing with *E. coli* single-colony analysis.**

Duplex sequencing has been used to detect rare variants by taking advantage of a reported error rate at or below  $10^{-7}$  per bp (1). To assess the fidelity of this sequencing method in our hands, we used 2-ml liquid cultures each derived from a single colony of *Escherichia coli*. We chose these samples as our best approximation of a negative control that should be (nearly) free of true double-stranded mutations because of the low mutation rate in *E. coli* and the relatively small number of rounds of cell division required to reach saturation in a 2-ml volume (2). As such, we used these samples to estimate the duplex-sequencing error rate (while recognizing that this estimate may be conservatively high if some variants are true *de novo* mutations rather than sequencing errors). Because the standard method to fragment DNA samples with ultrasonication is known to introduce substantial oxidative damage (3, 4), we tested this approach alongside an alternative enzymatic fragmentation strategy (New England Biolabs dsDNA Fragmentase). We also performed each fragmentation strategy either with or without subsequent treatment with multiple DNA repair enzymes to eliminate common forms of single-stranded DNA damage. The unrepaired ultrasonication libraries showed the expected signature of oxidative damage dominated by single-stranded G→T errors (5), but much of these strand-specific effects could be effectively removed by enzymatic treatment (Fig. S7). For reasons that are unclear, Fragmentase treatment produced extremely high rates of single-stranded misincorporation of As (i.e., C→A, G→A, and T→A), as well as single-stranded indels, which were insensitive to subsequent repair treatment (Fig. S7). However, because these errors were generally not matched by a complementary change on the other strand, they were successfully filtered out during generation of DCS data. The average frequencies of SNVs in DCS data were statistically indistinguishable for repaired ultrasonication and Fragmentase libraries (Table S2). We used the ultrasonication methods with enzymatic repair for all subsequent experiments in this study. For this library type, the average frequency of SNVs across three *E. coli* biological replicates was  $2.1 \times 10^{-8}$  per bp, and there was only a single identified indel in a total of 240 Mb of mapped DCS data, confirming the extreme accuracy of duplex sequencing (Table S2).

## Supplementary Materials and Methods

**Arabidopsis lines and growth conditions.** *Arabidopsis thaliana* Col-0 was used as the wild type line used for all analyses. Existing mutant lines (Table S3) were used as pollen donors in crosses with Col-0 to generate heterozygous F1 individuals (Fig. 2). All mutant lines were originally generated in a Col-0 background with exception of the *fpg* and *ogg1* mutants, which were in a Landsberg *erecta* (*Ler*) background (6, 7). F2 plants were screened with allele-specific PCR markers (Table S7) to identify individuals that were homozygous for the mutant allele and others that were homozygous for the wild type allele. Seeds were collected from each identified F2 homozygote to produce F3 full-sib families. After cold-stratification for three days, seeds were germinated and grown on ProMix BX soil mix in a growth room under a 10-hr short-day lighting conditions to extend rosette growth prior to bolting. For each candidate gene, sets of three F3 homozygous mutant families and three F3 wild type control families were grown in parallel. After seven to nine weeks of growth, approximately 35 g of rosette tissue was harvested from each family (representing approximately 60 individuals per family) and used for mitochondrial and plastid DNA purification. Additional F3 individuals in each family were left unharvested and allowed to set seed for subsequent analysis of F4 individuals.

**Mitochondrial and plastid DNA isolation.** Mitochondrial DNA purification was performed as described previously (8) except that initial mitochondrial pelleting spins were done at 20,000 rcf and subsequent washing spins were performed at 25,800 rcf. Plastid DNA was isolated simultaneously from the same tissue sample, using interleaved centrifugation steps during the mitochondrial DNA extraction. Pellets containing plastids (chloroplasts) from the 1500 rcf spin in the mitochondrial extraction protocol were gently resuspended with a paintbrush in a total of 6 ml of wash buffer (0.35 M sorbitol, 50 mM Tris-HCl pH 8, 25 mM EDTA) and then loaded onto two discontinuous sucrose gradients with 9 ml of 30% sucrose solution on top of 19.5 ml of 52% sucrose solution, each containing 50 mM Tris-HCl pH 8 and 25 mM EDTA. The sucrose gradients were then centrifuged at 95,400 rcf for 1.5 hr in a JS24.38 swinging bucket rotor on a Beckman-Coulter Avanti JXN-30 centrifuge. Plastids were harvested from the interface between the 30% and 52% sucrose solutions, diluted in wash buffer, and centrifuged in a JA14.50 fixed-angle rotor at 25,800 rcf for 16 min. Plastids were washed two more times by gently resuspending pellets in wash buffer using a paintbrush and centrifuging at 25,800 rcf. All organelle isolation steps were performed at 4° C in a cold room or refrigerated centrifuge. Plastid lysis and DNA purification followed the

same protocol as described previously for mitochondrial samples (8). Tissues samples were processed in pairs, with one mutant and one wild type sample in each batch.

***E. coli* growth and DNA extraction.** A glycerol stock of the *E. coli* K12 MG1655 strain was streaked onto an LB (Luria-Bertani) agar plate and grown overnight at 37° C. Single colonies were then used to inoculate each of three 2-ml liquid LB cultures, which were grown overnight at 37 °C on a shaker at 200 rpm. Half of each culture (approximately  $4 \times 10^9$  cells) was used for DNA extraction with an Invitrogen PureLink Genomic DNA Kit, following the manufacturer's protocol for gram-negative bacteria.

**Duplex sequencing library construction and Illumina sequencing.** Master stocks of duplex sequencing adapters were generated following the specific quantities and protocol described by Kennedy et al. (1) with the oligos in Table S8. For each mitochondrial and plastid DNA sample, a total of 100 ng was diluted in 50  $\mu$ l of T<sub>10</sub>E<sub>0.1</sub> buffer (10 mM Tris-HCl pH 8, 0.1 mM EDTA). DNA was fragmented with the Covaris M220 Focused-Ultrasonicator in microTUBE AFA Fiber Screw-Cap tubes to a target size of approximately 250 bp, using a duty cycle of 20%, peak incident power of 50 W, 200 cycles/burst, and six bouts of shearing for 20 sec each (separated by 15 sec pauses) at a temperature of 6° C. Ultrasonication settings were adapted from the protocol of Schmitt et al. (9).

After fragmentation, 80 ng of DNA was end repaired with the NEBNext End Repair Module (New England Biolabs E6050S) for 30 min at 20° C. Samples were then cleaned with 1.6 volumes of solid phase reversible immobilization (SPRI) beads. A-tailing of eluted samples was performed in a 50  $\mu$ l reaction volume, containing 5 U Klenow Fragment enzyme (New England Biolabs M0212), 1 mM dATP, and 1x NEB Buffer 2, at 37°C for 1 hr, followed by clean-up with 1.6 volumes of SPRI beads. After quantification with a Qubit dsDNA HS Kit (Invitrogen), adapter ligation was performed on 20 ng of the resulting sample in a 50  $\mu$ l reaction volume, using the NEBNext Quick Ligation Module (New England Biolabs E6056S) and 1  $\mu$ l of a 64-fold dilution of the duplex sequencing adapter master stock, for 15 min at 20° C. Following adapter ligation, samples were cleaned with 0.8 volumes of SPRI beads. Half of the cleaned sample was then treated with a cocktail of repair enzymes to remove single-stranded damage in a 50  $\mu$ l reaction volume containing 1x NEB CutSmart Buffer, 8 U Fpg (New England Biolabs M0240), 5 U Uracil-DNA Glycosylase (New England Biolabs M0280), and 10 U Endonuclease III (New England Biolabs M0268) for 30 min at 37° C. These enzymes were chosen to remove common sources of sequencing errors in DNA, such as uracil and oxidatively damaged bases. Unlike some commercial repair cocktails, we did not include a DNA polymerase. Therefore, any damaged strands should be cleaved,

effectively removing them from the sequenceable population rather than truly repairing them. Samples were then cleaned with 1.6 volumes of SPRI beads.

Following treatment with repair enzymes, the product was quantified with a Qubit dsDNA HS Kit, and 50 pg was amplified and dual-indexed using the primers shown in Table S8 and the NEBNext Ultra II Q5 Master Mix (New England Biolabs M0544) according to the manufacturer's instructions. All libraries were amplified for 19 cycles, which yielded the necessary redundancy to generate DCS families. After amplification, libraries were processed with 1 volume of SPRI beads and eluted in 20  $\mu$ l T<sub>10</sub>E<sub>0.1</sub> buffer. Libraries were assessed with an Agilent TapeStation 2200 and High Sensitivity D1000 reagents. If adapter dimers were detected (which was only the case for the batch of 12 libraries for *pollb* mutants and matched wild type controls), they were size selected with a 2% gel on a BluePippin (Sage Science), using a specified target range of 300-700 bp.

In initial tests of duplex sequencing with *E. coli* DNA sample, the above protocol was applied either with the described repair enzyme treatment or a control treatment that did not include these enzymes. It was also performed either with ultrasonication-based fragmentation or with an alternative fragmentation protocol based on dsDNA Fragmentase (New England Biolabs M0348). These protocol variations were performed in a 2 $\times$ 2 factorial design with three biological replicates. For the Fragmentase approach, 400 ng of DNA was incubated for 20 min at 37° C. Fragmentation was terminated by adding 5  $\mu$ l of 0.5 M EDTA to each reaction. Samples were then cleaned with 1.6 volumes of SPRI beads.

Libraries were sequenced on 2 $\times$ 150 bp runs on an Illumina NovaSeq 6000 platform, with a target yield of 40M read pairs per library. Libraries were generally processed and sequenced in batches of 12 corresponding to each candidate gene and its matched wild type controls (2 genomes  $\times$  2 genotypes  $\times$  3 biological replicates). The only exception was the *msh1*-CS3246 set, for which the mitochondrial and plastid libraries were generated and sequenced in separate batches of six libraries. Library construction and sequencing of the original *A. thaliana* Col-0 families and the *E. coli* samples were also done in their own batches. The raw Illumina sequencing reads have been deposited to the NCBI Sequence Read Archive under BioProjects PRJNA604834 (*E. coli*) and PRJNA604956 (*Arabidopsis*). Individual accessions for each library are provided in Tables S1 and S4.

**Duplex sequencing data analysis.** Raw Illumina reads from duplex sequencing libraries were processed with a custom Perl-based pipeline available at <https://github.com/dbsloan/duplexseq>. In the first step in the pipeline, 3' read trimming for low quality bases (q20) and adapter sequence was performed with cutadapt v1.16 (10). The

minimum length for retaining reads after trimming was set to 75, and the error tolerance for adapter trimming was set to 0.15. BBMerge (11) was then used to join overlapping paired-end reads into a single sequence where possible, with a minimum overlap of 30 bp and a maximum of five mismatches. The random duplex sequencing tags were then extracted from the resulting trimmed and merged reads, applying a stringent filter that rejected any reads with a barcode that contained a base with a quality score below 20. Reads were also filtered if they lacked the expected TGACT linker sequence built into the duplex sequencing adapters. Reads were then collapsed into single-stranded consensus sequences (SSCS), requiring a minimum of three reads to form an SSCS family. To call a consensus base, a minimum of 80% agreement was required within an SSCS family. When complementary SSCS families were available (reflecting the two different strands of an original double-stranded DNA molecule), they were used to form a DCS family. Any disagreements between the two complementary SSCS families were left as ambiguities in the DCS read, and any DCS read with ambiguities was later filtered out from downstream analyses.

The filtered DCS data were mapped using bowtie2 v2.2.3 under default parameter settings. The *E. coli* data were mapped against the corresponding K12 MG1655 reference genome (GenBank U00096.3). We later had to exclude a called SNV at position 4,296,060 and indel at position 4,296,381 because they were shared across all three replicates and appeared to reflect fixed differences between our *E. coli* line and the reference. Likewise, in *Arabidopsis*, we found that the plastid genome in our Col-0 line had a 1-bp expansion in a homopolymer at position 28,673 relative to the published reference genome (GenBank NC\_000932.1). In this case, we updated the reference genome for mapping purposes such that all reported coordinates for variants reflect a 1-bp shift at that position. For the mitochondrial genome reference, we used our recently revised version (12) of the Col-0 sequence (GenBank NC\_037304.1). All *Arabidopsis* samples were mapped to a database that contained both the mitochondrial and plastid genomes to avoid cross-mapping due to related sequences shared between them because of historical intergenomic transfers (MTPTs). The resulting mapping (SAM) files were parsed to extract all SNVs and simple indels, as well as coverage data. Multi-nucleotide variants (MNVs) and more complicated structural variants were not analyzed in this pipeline.

The identified variants and associated coverage data were filtered to address known sources of errors and artefacts. First, because of the DNA fragmentation and end-repair steps involved in library construction, the positions near the ends of inserts can be prone to sequencing errors that falsely appear to be true double-stranded changes (1). Therefore, we excluded any variants and sequencing coverage associated with 10 bp at each end of a DCS read. Second, contaminating sequences can easily be mistaken for *de novo* mutations. In

the case of mitochondrial and plastid genomes, one of the most likely sources of contamination is NUMT and NUPT sequences in the nucleus (13). Therefore, we used NCBI BLASTN v2.2.29+ to map each DCS reads containing an identified variant against the TAIR10 release of the *A. thaliana* Col-0 nuclear genome. Any variants that returned a perfect match to the nucleus were excluded as presumed NUMTs or NUPTs. However, one additional challenge for the mitochondrial genome is that *A. thaliana* Col-0 harbors a recent genome-scale insertion of mitochondrial DNA into Chromosome 2, only a fraction of which is accurately captured in the published nuclear genome assembly (14). Therefore, some NUMT artefacts cannot be detected using the currently available reference nuclear genome. To address this problem, we used total-cellular shotgun DNA sequencing data from *A. thaliana* Col-0 that was generated in a different lab (NCBI SRA SRR5216995) and therefore unlikely to share inherited heteroplasmic variants with our Col-0 line. We used these raw reads to generate a database of *k*-mer counts ( $k = 39$  bp) with KMC v3.0.0 (15), and we checked all identified variants for presence in this database. We filtered all SNVs with a count of 30 or greater in the SRR5216995 dataset, as we found that this was a reliable threshold for distinguishing known NUMTs from background sequencing errors in the mitochondrial genome. Finally, an additional complication with identifying *de novo* SNVs and indels in the mitochondrial genome is that it contains an abundance of small to medium-sized repeats that can become recombinationally active in some of the mutants analyzed in this study (16, 17) and can exhibit rare recombination even in wild type genotypes (18). When chimeric sequences resulting from recombination are mapped against a reference genome, they can give the false indication that *de novo* point mutations or indels have occurred. To eliminate these false positives, we used NCBI BLASTN to map DCS reads containing identified variants against the reference mitochondrial genome with a maximum e-value of  $1e-10$  to check for secondary hits (i.e., related repeat sequences) that contained the exact variant and thus could have arisen by recombination between repeat copies in the genome. SNVs that met these criteria were removed from the variant call set as likely recombinants. In the case of indels, subsequent manual curation was required for all flagged candidates to confirm variants that were consistent with recombination because of the inconsistent handling of gaps in repetitive regions by BLAST.

Identified SNVs were further characterized based on the reference genome sequence and annotation to classify their location as protein-coding, rRNA, tRNA, intronic, or intergenic. For protein-coding variants, the effect (if any) on amino acid sequence was reported. To classify indels associated with expansion or contraction of short tandem repeats, we used a standalone version of SSRIT for identification of repeat positions in the reference genomes (19).

The above steps were automated with the scripts available at <https://github.com/dbsloan/duplexseq>. The `duplexseq_batchscripts.pl` script in that repository can generate a shell script for each input library for submission to standard Slurm-based queuing systems with the same parameter settings that we applied for initial read processing and raw variant calling. Scripts are also provided to aggregate and filter the raw variant files from multiple samples run in parallel. Variant frequencies were calculated from output data by dividing the total number reads with an identified variant type by the relevant DCS coverage (expressed in total bp). Reported statistical analyses were performed in R v3.4.3, and plots were generated with the `ggplot2` package.

**Analysis of mitochondrial and plastid genome coverage variation in *Arabidopsis* mutants.** To investigate region-specific changes in copy number in mitochondrial and plastid genomes for *Arabidopsis* mutants relative to wild type, we used the DCS reads generated above to calculate sequence coverage in terms of counts per million mapped reads as described previously (8). Counts were averaged over 500-bp windows, and means were taken across three biological replicates for both mutants and matched wild type controls. Thus, when the reported ratio of these values (Figs. 3, S1 and S3) exceeds a value of 1, it indicates a region with increased relative coverage within the genome in the mutant compared to wild type. Likewise, values below 1 indicate decreased relative coverage in mutants.

**Expression and intron splicing analysis for *msh1*-SALK\_046763 mutants.** To test the hypothesis that *msh1* SALK\_046763 mutants exhibited weaker effects on leaf variegation and mutation rates because their intronic T-DNA insert only reduces but does not eliminate *MSH1* expression, we sampled F4 individuals derived from F3 homozygous SALK\_046763 mutant families and from their matched F3 wild type controls (Fig. 2). Four F4 individuals were sampled from each genotype (including at least one from all three F3 families for both mutants and wild types). Approximately 60-90 mg of rosette leaf tissue was collected from each plant after approximately 8 weeks of growth under 10-hr short-day lighting conditions, flash frozen with liquid nitrogen, and immediately processed using the Qiagen RNeasy Plant Mini Kit with on-column DNase digestion. For each sample, 1 µg of RNA was reverse transcribed into cDNA using Bio-Rad iScript Reverse Transcription Supermix in a 20 µl reaction volume. Quantitative PCR (qPCR) was performed with two different *MSH1* markers – one spanning the exons that flank the T-DNA insertion in intron 8 and another in exon 16 – as well as two reference gene markers (Table S9). All primer pairs were tested with conventional endpoint PCR and gel electrophoresis to ensure amplification of a single



product of expected size. Primer pair efficiency was assessed using a dilution series (Table S9). qPCR reactions (20  $\mu$ l total volume) contained 10  $\mu$ l of Bio-Rad 2x iTaq SYBR Green Supermix, 10 pmole of each primer, and 1  $\mu$ l of cDNA. Reactions were run on the Bio-Rad CFX96 Touch Real-Time PCR System. Thermal cycling conditions included 95° C for 3 min followed by 40 cycles of 95° C for 10 sec and 60° C for 30 sec, with a final melt curve analysis ramping from 65-95° C. Three technical replicates were run for each of the four biological replicates. In addition, a single replicate of a no-reverse-transcriptase control was run for each plant sample, and one no-template control was run for each primer set. For each cDNA sample, an average threshold cycle ( $C_T$ ) value was calculated from the three technical reps. The geometric mean of the two reference genes was calculated to create a single reference  $C_T$  value for each of the eight plants for normalization (calculation of  $\Delta C_T$  values). Differences in *MSH1* expression between mutant and wild type genotypes were estimated using the  $\Delta\Delta C_T$  method.

To test whether properly spliced *MSH1* mRNA transcripts were produced in SALK\_046763 homozygous mutants, we performed Sanger sequencing of an RT-PCR product spanning the junction of exons 8 and 9. cDNA was generated as described above for qPCR experiments. Endpoint PCR was performed using NEBNext 2x Master Mix, 0.25  $\mu$ M of forward and reverse primers (*MSH1* Exon 5F: 5'–CTGGTCTCAATCCTTTTGGTG–3' and *MSH1* Exon 10R: 5'–CAAACCTCTCCCCAGCGGC–3') and 1  $\mu$ l of cDNA template in a 20  $\mu$ l reaction volume. cDNAs were amplified from all four sampled SALK\_046763 homozygous mutant plants. Thermal cycling conditions were as follows: 98° C for 30 sec; 35 cycles of 98° C for 10 sec, 60° C for 15 sec and 72° C for 20 sec; 72° C for 2 min. PCR products were visualized by gel electrophoresis to ensure the amplification of a single product of the expected size (~460 bp). For Sanger sequencing reactions, 2.5  $\mu$ l of PCR product was treated with 1  $\mu$ l of ExoSAP-IT (Thermo-Fisher) and incubated at 37° C for 15 min after which the enzymes were deactivated at 80° C for 15 min. Each treated PCR sample was sent to GeneWiz for Sanger sequencing after addition of 5  $\mu$ l of *MSH1* Exon 5F primer and 6.5  $\mu$ l of dH<sub>2</sub>O. A single representative electropherogram for the junction between exons 8 and 9 is shown in Fig. S6, but all samples confirmed the presence of properly spliced products.

**ddPCR heteroplasmy assays.** To assess the possibility that observed heteroplasmies in duplex sequencing data could be transmitted across generations, we grew F4 seed collected from eight individuals from each of the three *msh1*-CS3246 mutant F3 families used in duplex sequencing. These F3 parents were siblings of the actual F3 individuals that were harvested for the duplex sequencing analysis. Approximately 80 mg of rosette leaf tissue was collected from F4 plants after approximately 8 weeks of growth under 10-hr short-day

lighting conditions. Collected tissue was either immediately processed or stored at -80° C until processing. Tissue samples were disrupted using the Qiagen TissueLyser, and total-cellular DNA was extracted using the Qiagen Plant DNeasy Mini Kit. DNA was quantified using a Qubit dsDNA HS Kit.

Locus-specific primers (Table S10) and allele-specific fluorescently labeled probes (Table S11) were designed for five different SNV targets (one mitochondrial and four plastid), which represented five of the most abundant variants in the *msh1*-CS3246 mutant lines based on duplex sequencing read counts (Dataset S1). Probes were designed with the target SNV in the center. Primers were tested by conventional endpoint PCR and gel electrophoresis to ensure that a single band was amplified for each primer set.

Each ddPCR reaction was set up in an initial 20 µl volume composed of 1x Bio-Rad ddPCR Supermix for Probes (no dUTP), 250 nM final concentration of each probe, 900 nM final concentration of each primer, 1 µl of the restriction enzyme BgIII (Thermo Scientific FD0083), and 5 µl of diluted template DNA (5-500 pg depending on the SNV target and type of DNA, i.e., total cellular or organellar). The restriction enzyme was included for fragmentation of genomic DNA to improve ddPCR efficiency and was selected because it does not cut within any of the target amplicons. PCR emulsions were created with a Bio-Rad QX200 Droplet Generator according to manufacturer's instructions, using Bio-Rad DG8 Cartridges and QX200 Droplet Generation Oil for Probes. Amplification was performed in a Bio-Rad C1000 Touch Thermal Cycler with a deep-well block with the following program: enzyme activation at 95° C for 10 min, 40 cycles of 94° C for 30 sec and a variable annealing/extension temperature (see Table S10) for 1 min, and enzyme deactivation at 98° C for 10 min – with a ramp speed of 2° C per sec for all steps. Droplets were read on the Bio-Rad QX200 Droplet Reader and analyzed using QuantaSoft Analysis Software to calculate copy numbers of reference and alternative alleles in each sample. Channel thresholds were set based on initial experiments utilizing positive and negative controls.

**MSH1 phylogenetic analysis.** To assess the distribution of *MSH1* outside of green plants, we performed BLASTP searches with the *Arabidopsis* MSH1 protein sequence against the NCBI nr database using taxonomic filters to exclude Viridiplantae. We also used individual searches restricted to specific clades, including Bacteria, Archaea, Glaucophyta, Rhodophyta, and Opisthokonta. Candidates for plant-like MSH1 proteins were identified based on high amino-acid identity and near full-length hits that extended through the characteristic GIY-YIG domain. To further expand our search to include some of the vast amount of biological diversity that is unculturable and only detected in environmental samples, we queried a sample of 2000 metagenome assemblies from the JGI IMG/MER

repository (20). We also searched against the IMG/VR database, which houses the largest available collection of viral sequences from both sequenced isolates and environmental samples (21). In cases where MSH1-like sequences were identified on metagenomic scaffolds, we searched other proteins encoded in the flanking sequence against the NCBI nr database to infer possible origins for the scaffold.

Identified protein sequences were aligned with other select members of the MutS family (Table S6) using the E-INS-i algorithm in MAFFT v6.903b (22). The resulting alignments were trimmed with Gblocks v0.91b (<http://molevol.cmima.csic.es/castresana/Gblocks.html>) to remove low-quality alignment regions, using the following parameters: t=p; b1=18; b2=18; b3=10; b4=5; b5=h. Models of sequence evolution were assessed with ProtTest v3.4.2 (23), which identified LG+I+G+F as the preferred model based on the Akaike Information Criterion. A maximum-likelihood phylogenetic search was then performed in PhyML v3.3.20190321 (24) using this substitution model, an SPR search of tree space, 1000 random starts, and 1000 bootstrap replicates.

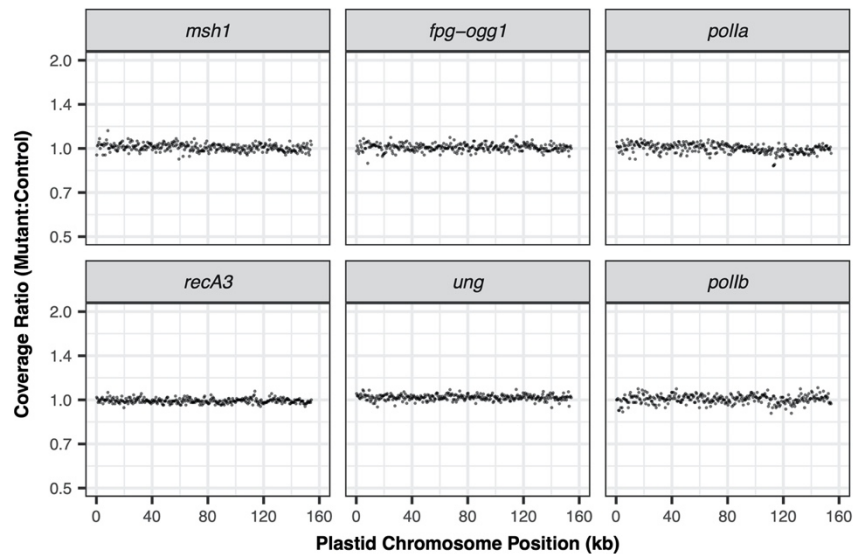

**Fig. S1.** Sequencing coverage variation across the plastid genome in mutants relative to their matched wild type controls. Each panel represents an average of three biological replicates, with the exception of two cases where a single outlier replicate (*ung* mutant 3 and *POLIA* wild type 3) was excluded due to what appeared to be unusually high amplification bias. The reported ratios are based on counts per million mapped reads in 500-bp windows.

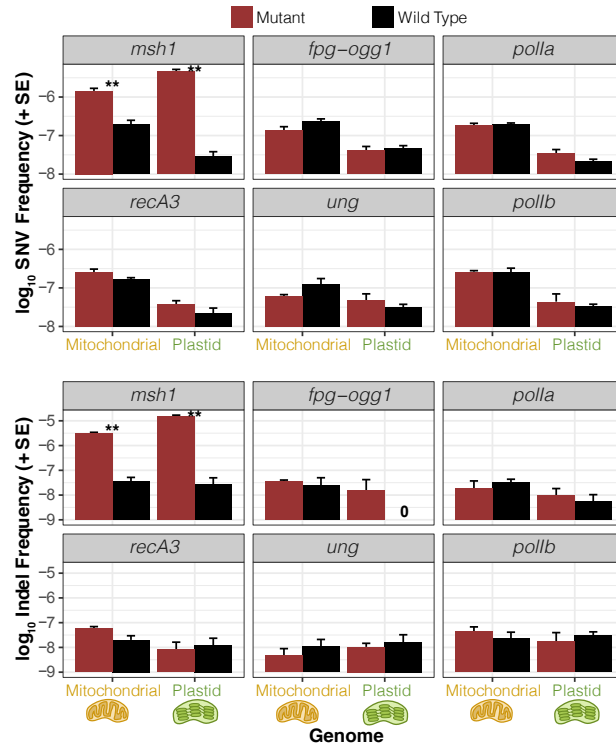

**Fig. S2.** The same data on SNV and indel frequencies presented in Fig. 4 but plotted on a log scale. See Fig. 4 legend for additional information.

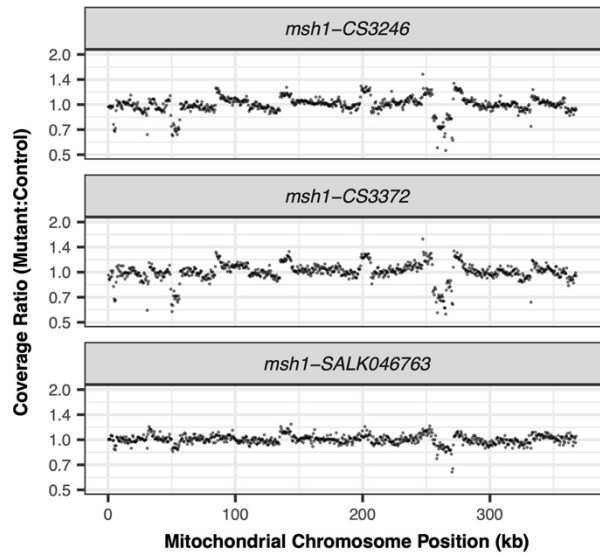

**Fig. S3.** Sequencing coverage variation across the mitochondrial genome in three different *msh1* mutants relative to their matched wild type controls. Each panel represents an average of three biological replicates. The reported ratios are based on counts per million mapped reads in 500-bp windows. The weaker effects of SALK\_046763 likely reflect the fact that this allele has a reduced expression level but is not a full functional knockout.

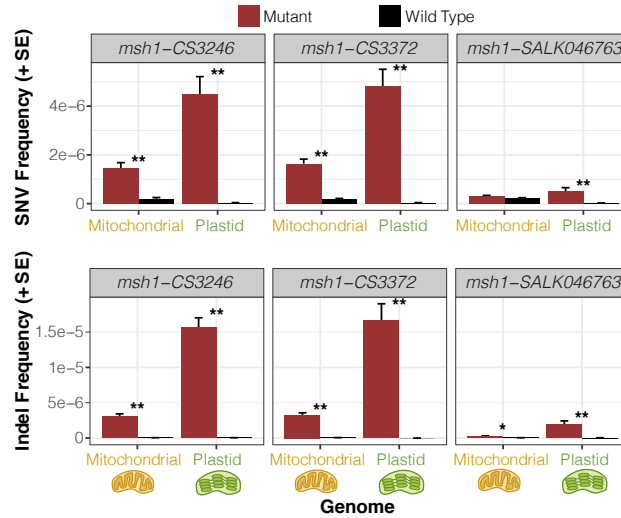

**Fig. S4.** Observed frequency of mitochondrial and plastid SNVs (top) and indels (bottom) based on duplex sequencing in three different *Arabidopsis msh1* mutant backgrounds compared to matched wild type controls. Variant frequencies are calculated as the total number of observed mismatches or indels in mapped duplex consensus sequences divided by the total bp of sequence coverage. Means and standard errors are based on three replicate F3 families for each genotype (see Fig. 2). Significant differences between mutant and wild type genotypes at a level of  $P < 0.05$  or  $P < 0.01$  (t-tests on log-transformed values) are indicated by \* and \*\*, respectively. The weaker effects of SALK\_046763 likely reflect the fact that this allele has a reduced expression level but is not a full functional knockout.

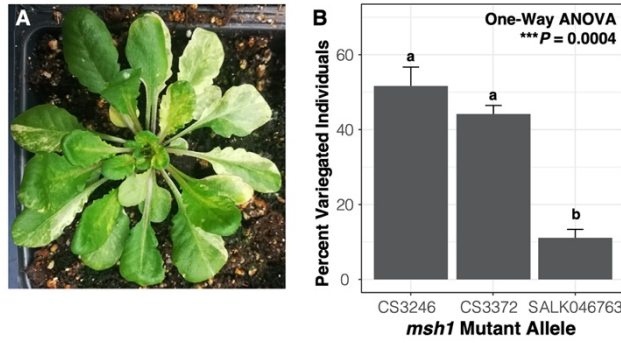

**Fig. S5.** Extent of leaf variegation observed for different *msh1* mutant alleles. **A.** An example of an *msh1* mutant (CS3372) individual with a leaf-variegation phenotype. **B.** Values represent the percentage of individuals in an F3 family from a homozygous mutant F2 parent that showed visible leaf variegation at time of harvest for mitochondrial and plastid DNA extraction. Means and standard errors are from three replicate F3 families from each mutant line (see Fig. 2). Between 45 and 66 individuals were scored for each family. Lowercase letters indicate significant differences between alleles based on a Tukey's HSD test. Consistent with its lower rate of observed sequence and structural variation in cytoplasmic genomes, the SALK\_046763 *msh1* mutant line exhibited less severe phenotypic effects.



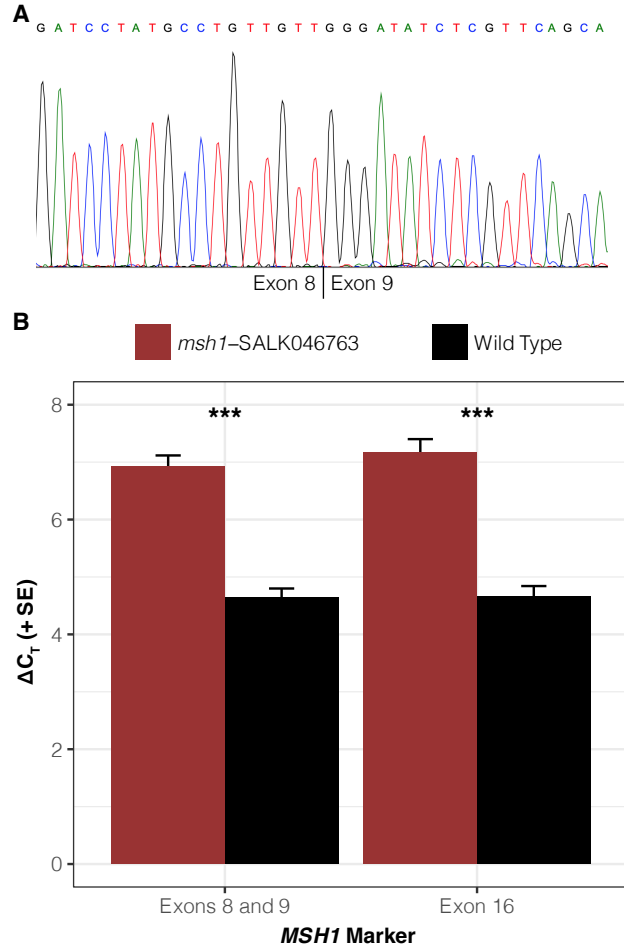

**Fig. S6.** Intact *MSH1* transcripts but reduced expression level in homozygous SALK\_046763 *msh1* mutants. **A.** Sanger trace from cDNA sequencing confirms that properly spliced transcripts are present in SALK\_046763 *msh1* mutants despite the large T-DNA insertion in intron 8. The vertical line below the trace indicates the location of the expected splice junction between exons 8 and 9. **B.**  $\Delta C_T$  values are calculated based on the difference in quantitative reverse-transcriptase PCR (qRT-PCR) threshold cycle value for each indicated *MSH1* marker and the geometric mean of the threshold cycle values from two reference genes (*UBC* and *UBC9*). Means and standard errors are from four biological replicates (F4 plants derived from crossing design described in Fig. 2), each of which is based on the mean of three technical replicates. The SALK\_046763 mutants exhibit higher  $\Delta C_T$  (indicating lower *MSH1* expression). Both *MSH1* markers indicate a similar shift in  $\Delta C_T$  values (2.3 cycles for exons 8/9 and 2.5 cycles for exon 16), corresponding to an approximately 5-fold difference in transcript abundance. Significant differences between mutant and wild type genotypes at a level of  $P < 0.001$  ( $t$ -tests) are indicated by \*\*\*.

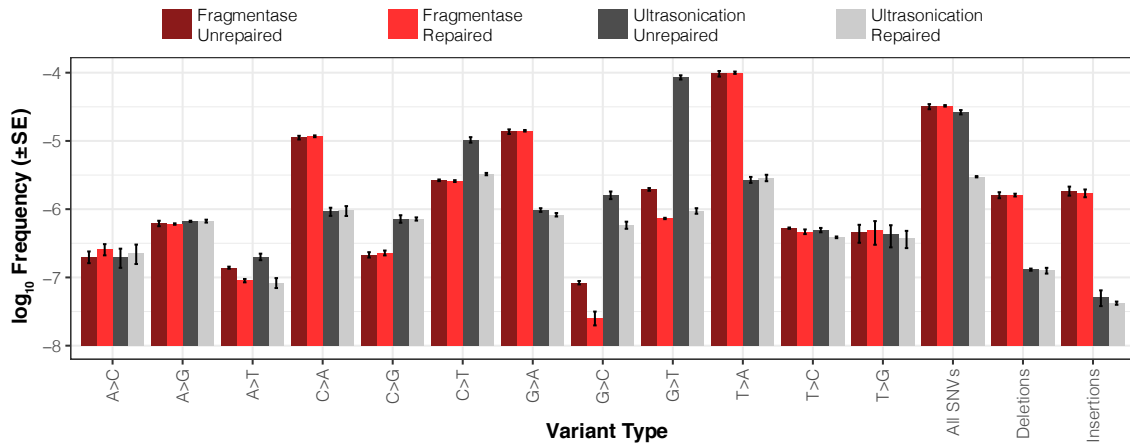

**Fig. S7.** Strand-specific variant frequencies from *E. coli* SSCS (not DCS) data for different library construction preparation methods (shearing by dsDNA Fragmentase or Covaris ultrasonication, either with or without subsequent enzymatic repair treatment). Values are based on means and standard errors from three biological replicates.

**Table S1. *E. coli* duplex sequencing library summary**

| <b>Library (SRA)</b> | <b>Frag. Method</b> | <b>Repair Treatment</b> | <b>Sample</b> | <b>Read Pairs (M)</b> | <b>Raw Sequence (Gb)</b> | <b>Mapped DCS (Mb)</b> |
|----------------------|---------------------|-------------------------|---------------|-----------------------|--------------------------|------------------------|
| SRR11018568          | Fragmentase         | Yes                     | 1             | 30.7                  | 9.2                      | 74.8                   |
| SRR11018564          | Fragmentase         | Yes                     | 2             | 35.9                  | 10.8                     | 79.1                   |
| SRR11018562          | Fragmentase         | Yes                     | 3             | 27.0                  | 8.1                      | 75.6                   |
| SRR11018567          | Fragmentase         | No                      | 1             | 36.4                  | 10.9                     | 95.9                   |
| SRR11018563          | Fragmentase         | No                      | 2             | 39.6                  | 11.9                     | 97.8                   |
| SRR11018561          | Fragmentase         | No                      | 3             | 28.7                  | 8.6                      | 86.2                   |
| SRR11018560          | Ultrasonication     | Yes                     | 1             | 37.0                  | 11.1                     | 80.2                   |
| SRR11018558          | Ultrasonication     | Yes                     | 2             | 27.2                  | 8.1                      | 68.9                   |
| SRR11018566          | Ultrasonication     | Yes                     | 3             | 28.7                  | 8.6                      | 90.9                   |
| SRR11018559          | Ultrasonication     | No                      | 1             | 32.6                  | 9.8                      | 98.6                   |
| SRR11018557          | Ultrasonication     | No                      | 2             | 21.4                  | 6.4                      | 69.9                   |
| SRR11018565          | Ultrasonication     | No                      | 3             | 28.9                  | 8.7                      | 65.5                   |
| <b>Total</b>         |                     |                         |               | <b>374.1</b>          | <b>112.2</b>             | <b>983.2</b>           |

**Table S2.** Variants detected in *E. coli* duplex consensus sequence data for different library construction preparation methods (shearing by dsDNA Fragmentase or Covaris ultrasonication, either with or without enzymatic repair treatment). Three different DNA samples were collected and then subjected to each of the methods.

| Method                        | Sample | Coverage (bp) | AT>CG | AT>GC | AT>TA | GC>AT | GC>CG | GC>TA | All SNVs | SNV Freq | Indels |
|-------------------------------|--------|---------------|-------|-------|-------|-------|-------|-------|----------|----------|--------|
| Fragmentase<br>Unrepaired     | A      | 9.6E+07       | 0     | 0     | 0     | 0     | 0     | 0     | 0        | 0        | 0      |
|                               | B      | 9.8E+07       | 0     | 0     | 0     | 0     | 0     | 1     | 1        | 1.0E-08  | 1      |
|                               | C      | 8.6E+07       | 0     | 0     | 0     | 1     | 0     | 1     | 2        | 2.3E-08  | 0      |
|                               | Total  | 2.8E+08       | 0     | 0     | 0     | 1     | 0     | 2     | 3        | 1.1E-08  | 1      |
| Fragmentase<br>Repaired       | A      | 7.5E+07       | 0     | 0     | 0     | 1     | 0     | 0     | 1        | 1.3E-08  | 0      |
|                               | B      | 7.9E+07       | 1     | 0     | 0     | 0     | 0     | 0     | 1        | 1.3E-08  | 0      |
|                               | C      | 7.6E+07       | 0     | 0     | 0     | 0     | 0     | 0     | 0        | 0        | 0      |
|                               | Total  | 2.3E+08       | 1     | 0     | 0     | 1     | 0     | 0     | 2        | 8.7E-09  | 0      |
| Ultrasonication<br>Unrepaired | A      | 9.9E+07       | 1     | 1     | 0     | 0     | 2     | 2     | 6        | 6.1E-08  | 0      |
|                               | B      | 7.0E+07       | 0     | 0     | 0     | 0     | 2     | 2     | 4        | 5.7E-08  | 0      |
|                               | C      | 6.5E+07       | 0     | 0     | 0     | 0     | 4     | 5     | 9        | 1.4E-07  | 0      |
|                               | Total  | 2.3E+08       | 1     | 1     | 0     | 0     | 8     | 9     | 19       | 8.1E-08  | 0      |
| Ultrasonication<br>Repaired   | A      | 8.0E+07       | 0     | 0     | 0     | 0     | 3     | 0     | 3        | 3.7E-08  | 0      |
|                               | B      | 6.9E+07       | 0     | 1     | 0     | 0     | 0     | 0     | 1        | 1.5E-08  | 0      |
|                               | C      | 9.1E+07       | 0     | 0     | 0     | 1     | 0     | 0     | 1        | 1.1E-08  | 1      |
|                               | Total  | 2.4E+08       | 0     | 1     | 0     | 1     | 3     | 0     | 5        | 2.1E-08  | 1      |

**Table S3.** Mutant lines used for analysis of candidate genes involved in DNA replication, recombination, and repair.

| <b>Gene</b>  | <b>AGI</b> | <b>Mutant Allele</b>  | <b>Source</b>          | <b>Ref</b> |
|--------------|------------|-----------------------|------------------------|------------|
| <i>MSH1</i>  | At3g24320  | CS3246 (chm1-2)       | ABRC                   | (25)       |
| <i>MSH1</i>  | At3g24320  | CS3372 (chm1-1)       | ABRC                   | (25)       |
| <i>MSH1</i>  | At3g24320  | SALK_046763           | ABRC                   | (25)       |
| <i>RECA3</i> | At3g10140  | CS872520 (recA3-1)    | ABRC                   | (16)       |
| <i>POLIA</i> | At1g50840  | SALK_022638 (polla-1) | ABRC                   | (26)       |
| <i>POLIB</i> | At3g20540  | SALK_134274 (pollb-1) | ABRC                   | (26)       |
| <i>FPG</i>   | At1g52500  | fpg                   | Dolores Córdoba-Cañero | (6, 7)     |
| <i>OGG1</i>  | At1g21710  | ogg1                  | Dolores Córdoba-Cañero | (6, 7)     |
| <i>UNG</i>   | At3g18630  | CS308297 (GK-440E07)  | ABRC                   | (27)       |

**Table S4. *Arabidopsis* duplex sequencing library summary**

| Library (SRA) | Gene/Line       | Genotype  | Purification | Rep | Read Pairs (M) | Raw Seq (Gb) | Mapped DCS (Mb) |         |
|---------------|-----------------|-----------|--------------|-----|----------------|--------------|-----------------|---------|
|               |                 |           |              |     |                |              | Mito            | Plastid |
| SRR11025108   | Col-0           | .         | cpDNA        | 1   | 26.1           | 7.8          | 5.4             | 54.6    |
| SRR11025107   | Col-0           | .         | cpDNA        | 2   | 22.9           | 6.9          | 3.4             | 41.3    |
| SRR11025106   | Col-0           | .         | cpDNA        | 3   | 21.8           | 6.6          | 10.3            | 61.4    |
| SRR11025105   | Col-0           | .         | mtDNA        | 1   | 23.6           | 7.1          | 39.3            | 3.6     |
| SRR11025175   | Col-0           | .         | mtDNA        | 2   | 25.8           | 7.7          | 33.7            | 4.8     |
| SRR11025174   | Col-0           | .         | mtDNA        | 3   | 22.1           | 6.6          | 30.8            | 2.1     |
| SRR11025121   | fpg-ogg1        | Mutant    | cpDNA        | 1   | 29.8           | 8.9          | 6.4             | 53.4    |
| SRR11025120   | fpg-ogg1        | Mutant    | cpDNA        | 2   | 23.9           | 7.2          | 3.9             | 35.3    |
| SRR11025119   | fpg-ogg1        | Mutant    | cpDNA        | 3   | 30.5           | 9.2          | 5.7             | 61.9    |
| SRR11025118   | fpg-ogg1        | Mutant    | mtDNA        | 1   | 22.7           | 6.8          | 42.8            | 1.0     |
| SRR11025117   | fpg-ogg1        | Mutant    | mtDNA        | 2   | 33.7           | 10.1         | 58.9            | 2.8     |
| SRR11025116   | fpg-ogg1        | Mutant    | mtDNA        | 3   | 30.9           | 9.3          | 50.4            | 3.0     |
| SRR11025114   | fpg-ogg1        | Wild Type | cpDNA        | 1   | 39.4           | 11.8         | 11.8            | 74.3    |
| SRR11025113   | fpg-ogg1        | Wild Type | cpDNA        | 2   | 33.2           | 10.0         | 7.0             | 56.6    |
| SRR11025112   | fpg-ogg1        | Wild Type | cpDNA        | 3   | 27.6           | 8.3          | 6.0             | 44.9    |
| SRR11025111   | fpg-ogg1        | Wild Type | mtDNA        | 1   | 33.7           | 10.1         | 57.8            | 1.6     |
| SRR11025110   | fpg-ogg1        | Wild Type | mtDNA        | 2   | 32.0           | 9.6          | 32.0            | 1.6     |
| SRR11025109   | fpg-ogg1        | Wild Type | mtDNA        | 3   | 32.7           | 9.8          | 39.8            | 2.4     |
| SRR11025100   | msh1-CS3246     | Mutant    | cpDNA        | 1   | 42.4           | 12.7         | 28.7            | 60.8    |
| SRR11025099   | msh1-CS3246     | Mutant    | cpDNA        | 2   | 32.4           | 9.7          | 25.4            | 71.5    |
| SRR11025098   | msh1-CS3246     | Mutant    | cpDNA        | 3   | 43.9           | 13.2         | 25.9            | 106.7   |
| SRR11025093   | msh1-CS3246     | Mutant    | mtDNA        | 1   | 32.6           | 9.8          | 103.1           | 2.7     |
| SRR11025092   | msh1-CS3246     | Mutant    | mtDNA        | 2   | 44.5           | 13.3         | 125.4           | 4.6     |
| SRR11025091   | msh1-CS3246     | Mutant    | mtDNA        | 3   | 41.5           | 12.5         | 98.8            | 2.4     |
| SRR11025097   | msh1-CS3246     | Wild Type | cpDNA        | 1   | 41.3           | 12.4         | 30.0            | 53.6    |
| SRR11025095   | msh1-CS3246     | Wild Type | cpDNA        | 2   | 38.1           | 11.4         | 30.3            | 73.3    |
| SRR11025094   | msh1-CS3246     | Wild Type | cpDNA        | 3   | 35.5           | 10.6         | 18.7            | 98.0    |
| SRR11025090   | msh1-CS3246     | Wild Type | mtDNA        | 1   | 38.9           | 11.7         | 126.6           | 1.5     |
| SRR11025089   | msh1-CS3246     | Wild Type | mtDNA        | 2   | 40.2           | 12.1         | 117.9           | 2.2     |
| SRR11025088   | msh1-CS3246     | Wild Type | mtDNA        | 3   | 36.3           | 10.9         | 143.7           | 1.4     |
| SRR11025159   | msh1-CS3372     | Mutant    | cpDNA        | 1   | 40.2           | 12.1         | 12.4            | 98.4    |
| SRR11025158   | msh1-CS3372     | Mutant    | cpDNA        | 2   | 39.8           | 11.9         | 12.9            | 95.7    |
| SRR11025157   | msh1-CS3372     | Mutant    | cpDNA        | 3   | 36.1           | 10.8         | 17.3            | 77.4    |
| SRR11025156   | msh1-CS3372     | Mutant    | mtDNA        | 1   | 33.5           | 10.1         | 79.8            | 8.3     |
| SRR11025155   | msh1-CS3372     | Mutant    | mtDNA        | 2   | 32.8           | 9.8          | 64.4            | 3.2     |
| SRR11025154   | msh1-CS3372     | Mutant    | mtDNA        | 3   | 36.6           | 11.0         | 62.0            | 16.2    |
| SRR11025152   | msh1-CS3372     | Wild Type | cpDNA        | 1   | 38.6           | 11.6         | 6.2             | 79.2    |
| SRR11025151   | msh1-CS3372     | Wild Type | cpDNA        | 2   | 33.6           | 10.1         | 7.7             | 76.6    |
| SRR11025104   | msh1-CS3372     | Wild Type | cpDNA        | 3   | 38.4           | 11.5         | 11.8            | 90.5    |
| SRR11025103   | msh1-CS3372     | Wild Type | mtDNA        | 1   | 35.6           | 10.7         | 56.2            | 2.4     |
| SRR11025102   | msh1-CS3372     | Wild Type | mtDNA        | 2   | 44.7           | 13.4         | 78.1            | 1.8     |
| SRR11025101   | msh1-CS3372     | Wild Type | mtDNA        | 3   | 32.0           | 9.6          | 48.7            | 15.9    |
| SRR11025087   | msh1-SALK046763 | Mutant    | cpDNA        | 1   | 29.1           | 8.7          | 5.2             | 24.8    |
| SRR11025086   | msh1-SALK046763 | Mutant    | cpDNA        | 2   | 26.2           | 7.9          | 14.5            | 39.8    |
| SRR11025078   | msh1-SALK046763 | Mutant    | cpDNA        | 3   | 36.2           | 10.9         | 17.5            | 64.0    |
| SRR11025083   | msh1-SALK046763 | Mutant    | mtDNA        | 1   | 30.1           | 9.0          | 61.2            | 1.0     |
| SRR11025082   | msh1-SALK046763 | Mutant    | mtDNA        | 2   | 34.9           | 10.5         | 70.6            | 1.2     |
| SRR11025149   | msh1-SALK046763 | Mutant    | mtDNA        | 3   | 29.9           | 9.0          | 82.4            | 1.7     |
| SRR11025080   | msh1-SALK046763 | Wild Type | cpDNA        | 1   | 35.0           | 10.5         | 14.1            | 55.8    |
| SRR11025079   | msh1-SALK046763 | Wild Type | cpDNA        | 2   | 32.8           | 9.8          | 13.9            | 63.1    |
| SRR11025084   | msh1-SALK046763 | Wild Type | cpDNA        | 3   | 27.6           | 8.3          | 9.4             | 28.3    |
| SRR11025077   | msh1-SALK046763 | Wild Type | mtDNA        | 1   | 33.8           | 10.1         | 84.7            | 2.2     |
| SRR11025150   | msh1-SALK046763 | Wild Type | mtDNA        | 2   | 30.7           | 9.2          | 62.8            | 1.1     |
| SRR11025081   | msh1-SALK046763 | Wild Type | mtDNA        | 3   | 27.9           | 8.4          | 59.3            | 1.0     |

|              |       |           |       |   |               |               |               |               |
|--------------|-------|-----------|-------|---|---------------|---------------|---------------|---------------|
| SRR11025172  | polla | Mutant    | cpDNA | 1 | 32.0          | 9.6           | 4.3           | 60.8          |
| SRR11025171  | polla | Mutant    | cpDNA | 2 | 42.1          | 12.6          | 13.7          | 121.1         |
| SRR11025170  | polla | Mutant    | cpDNA | 3 | 47.5          | 14.2          | 7.5           | 130.6         |
| SRR11025169  | polla | Mutant    | mtDNA | 1 | 35.6          | 10.7          | 45.9          | 7.4           |
| SRR11025168  | polla | Mutant    | mtDNA | 2 | 55.6          | 16.7          | 97.9          | 14.3          |
| SRR11025167  | polla | Mutant    | mtDNA | 3 | 40.6          | 12.2          | 84.2          | 4.4           |
| SRR11025166  | polla | Wild Type | cpDNA | 1 | 39.1          | 11.7          | 6.0           | 96.8          |
| SRR11025165  | polla | Wild Type | cpDNA | 2 | 47.6          | 14.3          | 9.6           | 135.0         |
| SRR11025163  | polla | Wild Type | cpDNA | 3 | 41.9          | 12.6          | 14.4          | 105.2         |
| SRR11025162  | polla | Wild Type | mtDNA | 1 | 54.1          | 16.2          | 60.4          | 7.1           |
| SRR11025161  | polla | Wild Type | mtDNA | 2 | 35.4          | 10.6          | 61.8          | 13.3          |
| SRR11025160  | polla | Wild Type | mtDNA | 3 | 50.2          | 15.1          | 115.3         | 3.1           |
| SRR11025178  | pollb | Mutant    | cpDNA | 1 | 23.1          | 6.9           | 11.1          | 31.3          |
| SRR11025177  | pollb | Mutant    | cpDNA | 2 | 40.1          | 12.0          | 27.7          | 103.7         |
| SRR11025164  | pollb | Mutant    | cpDNA | 3 | 23.7          | 7.1           | 14.5          | 22.5          |
| SRR11025153  | pollb | Mutant    | mtDNA | 1 | 38.5          | 11.6          | 117.6         | 2.2           |
| SRR11025096  | pollb | Mutant    | mtDNA | 2 | 39.3          | 11.8          | 87.3          | 1.7           |
| SRR11025085  | pollb | Mutant    | mtDNA | 3 | 44.6          | 13.4          | 102.8         | 1.0           |
| SRR11025148  | pollb | Wild Type | cpDNA | 1 | 21.9          | 6.6           | 14.6          | 28.1          |
| SRR11025137  | pollb | Wild Type | cpDNA | 2 | 50.6          | 15.2          | 37.2          | 114.9         |
| SRR11025126  | pollb | Wild Type | cpDNA | 3 | 24.2          | 7.3           | 15.4          | 22.8          |
| SRR11025115  | pollb | Wild Type | mtDNA | 1 | 38.9          | 11.7          | 143.4         | 2.4           |
| SRR11025176  | pollb | Wild Type | mtDNA | 2 | 43.5          | 13.1          | 105.5         | 1.6           |
| SRR11025173  | pollb | Wild Type | mtDNA | 3 | 52.1          | 15.6          | 123.9         | 1.4           |
| SRR11025147  | recA3 | Mutant    | cpDNA | 1 | 62.7          | 18.8          | 26.3          | 197.4         |
| SRR11025146  | recA3 | Mutant    | cpDNA | 2 | 55.0          | 16.5          | 21.2          | 171.4         |
| SRR11025145  | recA3 | Mutant    | cpDNA | 3 | 57.3          | 17.2          | 21.7          | 179.7         |
| SRR11025144  | recA3 | Mutant    | mtDNA | 1 | 56.7          | 17.0          | 127.1         | 5.9           |
| SRR11025143  | recA3 | Mutant    | mtDNA | 2 | 53.6          | 16.1          | 144.7         | 5.3           |
| SRR11025142  | recA3 | Mutant    | mtDNA | 3 | 53.7          | 16.1          | 131.5         | 13.6          |
| SRR11025141  | recA3 | Wild Type | cpDNA | 1 | 55.2          | 16.6          | 26.5          | 175.2         |
| SRR11025140  | recA3 | Wild Type | cpDNA | 2 | 51.4          | 15.4          | 19.1          | 162.3         |
| SRR11025139  | recA3 | Wild Type | cpDNA | 3 | 64.1          | 19.2          | 34.0          | 184.7         |
| SRR11025138  | recA3 | Wild Type | mtDNA | 1 | 56.8          | 17.0          | 167.2         | 4.8           |
| SRR11025136  | recA3 | Wild Type | mtDNA | 2 | 60.7          | 18.2          | 175.2         | 4.7           |
| SRR11025135  | recA3 | Wild Type | mtDNA | 3 | 47.3          | 14.2          | 170.8         | 7.2           |
| SRR11025134  | ung   | Mutant    | cpDNA | 1 | 69.3          | 20.8          | 28.5          | 129.0         |
| SRR11025133  | ung   | Mutant    | cpDNA | 2 | 62.5          | 18.8          | 21.8          | 121.3         |
| SRR11025132  | ung   | Mutant    | cpDNA | 3 | 55.9          | 16.8          | 16.0          | 109.1         |
| SRR11025131  | ung   | Mutant    | mtDNA | 1 | 56.4          | 16.9          | 124.7         | 2.6           |
| SRR11025130  | ung   | Mutant    | mtDNA | 2 | 57.3          | 17.2          | 106.8         | 14.2          |
| SRR11025129  | ung   | Mutant    | mtDNA | 3 | 56.3          | 16.9          | 103.1         | 2.1           |
| SRR11025128  | ung   | Wild Type | cpDNA | 1 | 63.2          | 19.0          | 26.3          | 122.5         |
| SRR11025127  | ung   | Wild Type | cpDNA | 2 | 61.4          | 18.4          | 19.3          | 113.1         |
| SRR11025125  | ung   | Wild Type | cpDNA | 3 | 56.3          | 16.9          | 11.2          | 91.2          |
| SRR11025124  | ung   | Wild Type | mtDNA | 1 | 47.2          | 14.1          | 125.5         | 2.3           |
| SRR11025123  | ung   | Wild Type | mtDNA | 2 | 45.8          | 13.8          | 73.2          | 2.3           |
| SRR11025122  | ung   | Wild Type | mtDNA | 3 | 73.2          | 22.0          | 142.7         | 10.7          |
| <b>Total</b> |       |           |       |   | <b>4137.3</b> | <b>1241.2</b> | <b>5459.2</b> | <b>4700.7</b> |

**Table S5.** ddPCR data corresponding to results reported in Fig. 6. Samples shown in italics and labeled F4-sib are not included in Fig. 6 and represent follow-up assays performed on siblings of F4 individuals that were identified in the initial analysis as having the mutant allele at detectable frequencies. Follow-up assays were also performed for the plastid 36873 SNV on 16 additional F4 individuals not listed in this table that were from families in the M2 line (*msh1*-CS3246 mutant, biological replicate 2) other than the M2-1-21-4 family that exhibited apparent homoplasmy for the mutant allele. All of these 16 additional samples exhibited mutant allele frequencies well below the noise threshold of ~0.2%

| SNV                  | Sample Type   | Sample ID           | Mutant Allele Freq (%) |
|----------------------|---------------|---------------------|------------------------|
| Mito 91017           | F3 Pool       | M3 mtDNA            | 14.3                   |
| Mito 91017           | F4            | M3-1-34-1-16        | 0.0                    |
| Mito 91017           | F4            | M3-1-34-2-18        | 66.7                   |
| <i>Mito 91017</i>    | <i>F4-sib</i> | <i>M3-1-34-2-19</i> | <i>50.2</i>            |
| Mito 91017           | F4            | M3-1-34-3-8         | 0.1                    |
| Mito 91017           | F4            | M3-1-34-4-10        | 0.1                    |
| Mito 91017           | F4            | M3-1-34-5-14        | 24.4                   |
| <i>Mito 91017</i>    | <i>F4-sib</i> | <i>M3-1-34-5-11</i> | <i>0.1</i>             |
| <i>Mito 91017</i>    | <i>F4-sib</i> | <i>M3-1-34-5-12</i> | <i>5.6</i>             |
| Mito 91017           | F4            | M3-1-34-6-1         | 58.7                   |
| Mito 91017           | F4            | M3-1-34-7-2         | 0.2                    |
| Mito 91017           | F4            | M3-1-34-8-3         | 0.0                    |
| Mito 91017           | Control       | M1-1-15-1-2         | 0.0                    |
| Mito 91017           | Control       | M1-1-15-2-1         | 0.0                    |
| Mito 91017           | Control       | M1-1-15-3-2         | 0.1                    |
| Mito 91017           | Control       | M1-1-15-4-2         | 0.2                    |
| Mito 91017           | Control       | M2-1-21-2-27        | 0.0                    |
| Mito 91017           | Control       | M2-1-21-4-15        | 0.2                    |
| Mito 91017           | Control       | M2-1-21-5-20        | 0.0                    |
| Mito 91017           | Control       | M2-1-21-6-4         | 0.1                    |
| Plastid 29562        | F3 Pool       | M1 cpDNA            | 2.5                    |
| Plastid 29562        | F4            | M1-1-15-1-2         | 0.0                    |
| Plastid 29562        | F4            | M1-1-15-2-1         | 0.0                    |
| Plastid 29562        | F4            | M1-1-15-3-2         | 0.0                    |
| Plastid 29562        | F4            | M1-1-15-4-2         | 0.0                    |
| Plastid 29562        | F4            | M1-1-15-5-2         | 0.0                    |
| Plastid 29562        | F4            | M1-1-15-6-1         | 0.0                    |
| Plastid 29562        | F4            | M1-1-15-7-1         | 0.0                    |
| Plastid 29562        | F4            | M1-1-15-8-2         | 0.0                    |
| Plastid 29562        | Control       | M2-1-21-2-27        | 0.0                    |
| Plastid 29562        | Control       | M2-1-21-4-15        | 0.0                    |
| Plastid 29562        | Control       | M2-1-21-5-20        | 0.0                    |
| Plastid 29562        | Control       | M2-1-21-6-4         | 0.0                    |
| Plastid 29562        | Control       | M3-1-34-1-16        | 0.0                    |
| Plastid 29562        | Control       | M3-1-34-3-8         | 0.0                    |
| Plastid 36873        | F3 Pool       | M2 cpDNA            | 3.5                    |
| Plastid 36873        | F4            | M2-1-21-1-22        | 0.0                    |
| Plastid 36873        | F4            | M2-1-21-2-17        | 0.0                    |
| Plastid 36873        | F4            | M2-1-21-3-12        | 0.0                    |
| Plastid 36873        | F4            | M2-1-21-4-15        | 100.0                  |
| <i>Plastid 36873</i> | <i>F4-sib</i> | <i>M2-1-21-4-16</i> | <i>99.9</i>            |
| <i>Plastid 36873</i> | <i>F4-sib</i> | <i>M2-1-21-4-17</i> | <i>100.0</i>           |
| <i>Plastid 36873</i> | <i>F4-sib</i> | <i>M2-1-21-4-18</i> | <i>100.0</i>           |
| <i>Plastid 36873</i> | <i>F4-sib</i> | <i>M2-1-21-4-19</i> | <i>100.0</i>           |
| Plastid 36873        | F4            | M2-1-21-5-20        | 0.0                    |



|               |         |              |     |
|---------------|---------|--------------|-----|
| Plastid 36873 | F4      | M2-1-21-6-4  | 0.0 |
| Plastid 36873 | F4      | M2-1-21-7-6  | 0.0 |
| Plastid 36873 | F4      | M2-1-21-8-8  | 0.0 |
| Plastid 36873 | Control | M1-1-15-1-2  | 0.0 |
| Plastid 36873 | Control | M1-1-15-2-1  | 0.0 |
| Plastid 36873 | Control | M3-1-21-2-18 | 0.0 |
| Plastid 36873 | Control | M3-1-21-4-10 | 0.0 |
| Plastid 36873 | Control | M3-1-21-5-14 | 0.0 |
| Plastid 36873 | Control | M3-1-21-6-1  | 0.0 |
| Plastid 48483 | F3 Pool | M3 cpDNA     | 2.4 |
| Plastid 48483 | F4      | M3-1-34-1-16 | 0.0 |
| Plastid 48483 | F4      | M3-1-34-2-18 | 0.0 |
| Plastid 48483 | F4      | M3-1-34-3-8  | 0.1 |
| Plastid 48483 | F4      | M3-1-34-4-10 | 0.0 |
| Plastid 48483 | F4      | M3-1-34-5-15 | 0.0 |
| Plastid 48483 | F4      | M3-1-34-6-1  | 0.1 |
| Plastid 48483 | F4      | M3-1-34-7-2  | 0.1 |
| Plastid 48483 | F4      | M3-1-34-8-3  | 0.0 |
| Plastid 48483 | Control | M1-1-15-5-2  | 0.0 |
| Plastid 48483 | Control | M1-1-15-6-1  | 0.0 |
| Plastid 48483 | Control | M1-1-15-7-1  | 0.1 |
| Plastid 48483 | Control | M1-1-15-8-2  | 0.0 |
| Plastid 48483 | Control | M2-1-21-2-27 | 0.0 |
| Plastid 48483 | Control | M2-1-21-4-15 | 0.0 |
| Plastid 48483 | Control | M2-1-21-5-20 | 0.0 |
| Plastid 48483 | Control | M2-1-21-6-4  | 0.1 |
| Plastid 72934 | F3 Pool | M3 cpDNA     | 1.4 |
| Plastid 72934 | F4      | M3-1-34-1-16 | 0.0 |
| Plastid 72934 | F4      | M3-1-34-2-18 | 0.0 |
| Plastid 72934 | F4      | M3-1-34-3-8  | 0.0 |
| Plastid 72934 | F4      | M3-1-34-4-10 | 0.0 |
| Plastid 72934 | F4      | M3-1-34-5-14 | 0.0 |
| Plastid 72934 | F4      | M3-1-34-6-1  | 0.1 |
| Plastid 72934 | F4      | M3-1-34-7-2  | 0.0 |
| Plastid 72934 | F4      | M3-1-34-8-3  | 0.1 |
| Plastid 72934 | Control | M1-1-15-5-2  | 0.1 |
| Plastid 72934 | Control | M1-1-15-6-1  | 0.0 |
| Plastid 72934 | Control | M1-1-15-7-1  | 0.1 |
| Plastid 72934 | Control | M1-1-15-8-2  | 0.0 |
| Plastid 72934 | Control | M2-1-21-2-27 | 0.1 |
| Plastid 72934 | Control | M2-1-21-4-15 | 0.1 |

**Table S6.** MSH1 and other MutS sequences used for phylogenetic analysis. Targeting predictions were generated with TargetP v2.0 (28).

| Sequence                                                          | Clade               | Source      | Accession            | TargetP Prediction |
|-------------------------------------------------------------------|---------------------|-------------|----------------------|--------------------|
| <i>Arabidopsis thaliana</i>                                       | Viridiplantae       | GenBank     | AAO49798             | Mitochondrial      |
| <i>Oryza sativa</i>                                               | Viridiplantae       | GenBank     | XP_015636674         | Plastid            |
| <i>Selaginella moellendorffii</i>                                 | Viridiplantae       | GenBank     | XP_024525391         | Mitochondrial      |
| <i>Physcomitrella patens</i>                                      | Viridiplantae       | GenBank     | XP_024362883         | Mitochondrial      |
| <i>Marchantia polymorpha</i>                                      | Viridiplantae       | GenBank     | PTQ35957             | None               |
| <i>Klebsormidium nitens</i>                                       | Viridiplantae       | GenBank     | GAQ89439             | None               |
| <i>Chlamydomonas eustigma</i>                                     | Viridiplantae       | GenBank     | GAX83118             | Plastid            |
| <i>Chloropicon primus</i>                                         | Viridiplantae       | GenBank     | QDZ22437             | None               |
| <i>Coccomyxa subellipsoidea</i> C-169                             | Viridiplantae       | GenBank     | XP_005644580         | None               |
| <i>Ostreococcus lucimarinus</i>                                   | Viridiplantae       | GenBank     | XP_001416776         | None               |
| Putative Bathycoccaceae (Tara Oceans metagenome)                  | Viridiplantae       | JGI IMG/MER | Ga0211588_10010061   | None               |
| Putative Chlorophyta (Trout Bog Lake metagenome)                  | Viridiplantae       | JGI IMG/MER | Ga0164297_100118835  | None               |
| <i>Guillardia theta</i>                                           | Cryptophyta         | GenBank     | XP_005824881         | None               |
| <i>Chrysochromulina tobinii</i>                                   | Haptophyta          | GenBank     | KOO23129             | Mitochondrial      |
| <i>Emiliana huxleyi</i> CCMP 1516                                 | Haptophyta          | JGI IMG     | 2508101639           | Mitochondrial      |
| <i>Babesia microti</i>                                            | Alveolata           | GenBank     | XP_021338715         | Mitochondrial      |
| <i>Lingulodinium polyedra</i>                                     | Alveolata           | GenBank     | QDO16335             | None               |
| <i>Vitrella brassicaformis</i>                                    | Alveolata           | GenBank     | CEL93038             | None               |
| Putative diatom (Ellis Fjord metagenome)                          | Stramenopile        | IMG/MER     | Ga0307978_10152622   | None               |
| <i>Thalassiosira pseudonana</i>                                   | Stramenopile        | GenBank     | XP_002294874         | None               |
| <i>Fragilariopsis cylindrus</i>                                   | Stramenopile        | GenBank     | OEU09203             | None               |
| <i>Phaeodactylum tricornutum</i>                                  | Stramenopile        | GenBank     | XP_002177023         | None               |
| <i>Nannochloropsis gaditana</i>                                   | Stramenopile        | GenBank     | XP_005855452         | Mitochondrial      |
| <i>Agarolytica rhodophyticola</i>                                 | Gammaproteobacteria | GenBank     | WP_086930438         | None               |
| <i>Endobugula sertula</i>                                         | Gammaproteobacteria | GenBank     | ODS23082/ODS23083    | None               |
| Putative bacterium (Damariscotta River mineral coupon metagenome) | Gammaproteobacteria | JGI IMG/MER | Ga0316202_100001462  | .                  |
| Putative virus (North Sea metagenome)                             | Virus               | JGI IMG/VR  | Ga0115564_1000006915 | .                  |
| Putative virus (San Pedro Channel metagenome)                     | Virus               | JGI IMG/VR  | Ga0181430_100039610  | .                  |
| Putative virus (Ellis Fjord metagenome)                           | Virus               | JGI IMG/MER | Ga0307978_10013766   | .                  |
| Unknown Scaffold (Western Arctic Ocean metagenome)                | Undetermined        | JGI IMG/MER | Ga0302121_100079582  | .                  |
| <i>Sarcophyton glaucum</i>                                        | MutS7               | GenBank     | O63852               | .                  |
| <i>Klosneuvirus KNV1</i>                                          | MutS7               | GenBank     | ARF11760             | .                  |
| <i>Campylobacteriales</i> bacterium 16-40-21                      | MutS7               | GenBank     | OYZ35361             | .                  |
| <i>Saccharomyces cerevisiae</i>                                   | Fungal MSH1         | GenBank     | AJU17961             | Mitochondrial      |
| <i>Escherichia coli</i>                                           | MutS1               | GenBank     | AIZ90229             | .                  |

**Table S7.** Primers for genotyping of mutant alleles for candidate genes.

| Gene/Line           | Fwd Primer                         | Rev Primer                           | Ref  |
|---------------------|------------------------------------|--------------------------------------|------|
| MSH1-CS3246 WT      | ATATTGAACTCAATTTCTTTGATTTTGGTGTGGT | GAAGAGTAGATGGTTTCTTACATGTCTGCAATCAC  | (16) |
| MSH1-CS3246 Mut     | ATATTGAACTCAATTTCTTTGATTTTGGTGTGGT | TGAAGAGTAGATGGTTTCTTACATGTCTGCAATTTT | (16) |
| MSH1-CS3372 WT      | TTAAAAGATGGAAACCTCAACTGGGAGATGTTAC | TGTGAGTAAGCTTGAAATTCAAAAGGATTGTGTAC  |      |
| MSH1-CS3372 Mut     | TTAAAAGATGGAAACCTCAACTGGGAGATGTTAT | TGTGAGTAAGCTTGAAATTCAAAAGGATTGTGTAC  |      |
| MSH1-SALK046763 WT  | CGACAGACTTTGGATGACCT               | CATACAATACCCCTTGCTG                  |      |
| MSH1-SALK046763 Mut | CGACAGACTTTGGATGACCT               | ATTTTGCCGATTTTCGGAAC                 |      |
| RECA3 WT            | GATTCCATTAGCCATGAACCGA             | TCTTTCCAGATGCTTCTTTCCG               | (16) |
| RECA3 Mut           | TAGCATCTGAATTTATAACCAATCTCGATACAC  | TCTTTCCAGATGCTTCTTTCCG               | (16) |
| POLIA WT            | GGATCTGAAGGGAAAATCGT               | CAAAACATCCCCACCTACAG                 | (29) |
| POLIA Mut           | GGATCTGAAGGGAAAATCGT               | ATTTTGCCGATTTTCGGAAC                 | (29) |
| POLIB WT            | TTACCAAAAGCATCATCCTGG              | AGAGTTTTCGTGTCCCCATC                 | (29) |
| POLIB Mut           | TTACCAAAAGCATCATCCTGG              | ATTTTGCCGATTTTCGGAAC                 | (29) |
| UNG WT              | ACTTGGAGAAGGTAAGCAATTCA            | CCATACAAAATATAATACACCACCACTC         | (27) |
| UNG Mut             | ACTTGGAGAAGGTAAGCAATTCA            | ATATTGACCATCATACTCATTGC              | (27) |
| FPG WT              | AACGAAGCAATAAAGGCGC                | CCACTCCTCTGAGTCCTTTACAGC             | (6)  |
| FPG Mut             | ATTTTGCCGATTTTCGGAAC               | CCACTCCTCTGAGTCCTTTACAGC             | (6)  |
| OGG1 WT             | GATGAAGAGACCTCGACCTAC              | CTCTTCTCAGAAACCTAGATAA               | (6)  |
| OGG1 Mut            | CGATTACCGTATTTATCCCGTTC            | CTCTTCTCAGAAACCTAGATAA               | (6)  |

**Table S8.** Oligos for duplex sequencing adapters and library amplification

| <b>Primer</b>                       | <b>Sequence<sup>a</sup></b>                                            |
|-------------------------------------|------------------------------------------------------------------------|
| i7 Library Amplification Primer     | CAAGCAGAAGACGGCATAACGAGATXXXXXXXXGTGACTGGAGTTCAGACGTGTGCTCTTCCGATC*T   |
| i5 Library Amplification Primer     | AATGATACGGCGACCACCGAGATCTACACXXXXXXXXACACTCTTCCCTACACGACGCTCTTCCGATC*T |
| Duplex Adapter Oligo 1 <sup>b</sup> | ACACTCTTCCCTACACGACGCTCTTCCGATCT                                       |
| Duplex Adapter Oligo 2              | TCTTCTACAGTCANNNNNNNNNNAGATCGGAAGAGCACACGTCTGAACTCCAGTCAC              |

<sup>a</sup>In primer sequences, Xs indicate conventional i5 and i7 library barcodes, Ns indicate random duplex sequencing barcodes, and \* indicates a phosphorothioate bond.

<sup>b</sup>The Duplex Adapter Oligo 1 is shortened relative to the standard protocol (1) to facilitate i5 barcoding during library amplification.

**Table S9.** Primers for *msh1*-SALK046763 qPCR expression analysis and efficiency statistics from dilution series

| Gene/Line        | Fwd Primer              | Rev Primer             | R <sup>2</sup> | Efficiency | Ref  |
|------------------|-------------------------|------------------------|----------------|------------|------|
| MSH1 exons 8/9   | GCATGCACATCCAGGAAGTC    | GAGCTTGGTAACTAAGGCTTC  | 0.979          | 1.35       |      |
| MSH1 exon 16     | GGGCGTCTGATACAATTGGTG   | GCTAAAGATAAAGCCTCAGCTG | 0.995          | 0.85       |      |
| UBC9 (At4g27960) | TCACAATTCCAAGGTGCTGC    | TCATCTGGGTTTGGATCCGT   | 0.993          | 0.95       | (30) |
| UBC (At5g25760)  | CTGCGACTCAGGGAATCTTCTAA | TTGTGCCATTGAATTGAACCC  | 0.996          | 0.91       | (30) |

**Table S10.** Primers for ddPCR heteroplasmy assays

| <b>SNV Target</b> | <b>Fwd Primer</b>      | <b>Rev Primer</b>         | <b>Annealing Temp (° C)</b> |
|-------------------|------------------------|---------------------------|-----------------------------|
| Plastid 29562     | TCTTTCCTTGGTTGAATCGA   | GAGATACTGTATGGGGTTTCC     | 57                          |
| Plastid 36873     | AATAATTGAAGGAGCCCCTC   | ACAAGATCAAGCTGGTAAGG      | 57                          |
| Plastid 48483     | AGGAAAGGTTAAATGAGTTCCG | ACTGGGAATGAATAAATAAGATCGG | 57                          |
| Plastid 72934     | CTTTCAGGAGTGGCTTGCTTCG | TTTGTATAGACGTTGAGCGGACG   | 65                          |
| Mito 91017        | CGTCATCGTCTCAACTACC    | CAAAGACGACATCCTGAGG       | 57                          |

**Table S11.** Allele-specific probes for ddPCR heteroplasmy assays (synthesized by Integrated DNA Technologies [IDT])

| <b>SNV Target</b> | <b>Reference Probe<sup>a</sup>*</b>      | <b>Alternative Probe<sup>b*</sup></b> |
|-------------------|------------------------------------------|---------------------------------------|
| Plastid 29562     | /56-FAM/CCTATT+CC+A+T+TTT+C+CT/3IABkFQ/  | /5HEX/CC+T+ATT+CC+A+C+TTTCC/3IABkFQ/  |
| Plastid 36873     | /56-FAM/C+CAT+T+CT+G+T+CTAAATAG/3IABkFQ/ | /5HEX/C+CATTCT+G+C+CTA+A+ATA/3IABkFQ/ |
| Plastid 48483     | /56-FAM/TT+GCC+C+T+TCAA+C+TAT/3IABkFQ/   | /5HEX/TTGCC+C+C+TCAAC+TAT/3IABkFQ/    |
| Plastid 72934     | /56-FAM/CAA+A+ACC+C+T+CCACG+CC/3IABkFQ/  | /5HEX/CAAA+ACC+C+C+CCACGC/3IABkFQ/    |
| Mito 91017        | /56-FAM/TCAACTAG+A+A+TT+C+C+CTT/3IABkFQ/ | /5HEX/CAA+CTAG+A+G+TTC+CCT/3IABkFQ/   |

<sup>a</sup>Each probe for the reference allele carries a 5' 6-FAM fluorescent modification and a 3' Iowa Black fluorescent quencher.

<sup>b</sup>Each probe for the alternative allele carries a 5' HEX fluorescent modification and a 3' Iowa Black fluorescent quencher.

\*Bases preceded by a + symbol indicate locked nucleic acids (LNA).

**Dataset S1 (separate file).** Detailed summary information for each variant call. Coordinates are based on the *A. thaliana* Col-0 mitochondrial reference genome (NC\_037304.1) and a modified version of the plastid reference genome (NC\_000932.1) that includes a 1-bp insertion at position 28,673. (DatasetS1.xlsx)



## SI References

1. S. R. Kennedy *et al.*, Detecting ultralow-frequency mutations by Duplex Sequencing. *Nature Protocols* **9**, 2586-2606 (2014).
2. J. Jee *et al.*, Rates and mechanisms of bacterial mutagenesis from maximum-depth sequencing. *Nature* **534**, 693-696 (2016).
3. L. Chen, P. Liu, T. C. Evans, L. M. Ettwiller, DNA damage is a pervasive cause of sequencing errors, directly confounding variant identification. *Science* **355**, 752-756 (2017).
4. M. Costello *et al.*, Discovery and characterization of artifactual mutations in deep coverage targeted capture sequencing data due to oxidative DNA damage during sample preparation. *Nucleic Acids Research* **41**, e67 (2013).
5. B. Arbeithuber, K. D. Makova, I. Tiemann-Boege, Artifactual mutations resulting from DNA lesions limit detection levels in ultrasensitive sequencing applications. *DNA Research* **23**, 547-559 (2016).
6. T. M. Murphy, What is base excision repair good for?: knockout mutants for FPG and OGG glycosylase genes in Arabidopsis. *Physiologia Plantarum* **123**, 227-232 (2005).
7. D. Córdoba-Cañero, T. Roldán-Arjona, R. R. Ariza, Arabidopsis ZDP DNA 3'-phosphatase and ARP endonuclease function in 8-oxoG repair initiated by FPG and OGG 1 DNA glycosylases. *Plant Journal* **79**, 824-834 (2014).
8. Z. Wu, G. Waneka, D. B. Sloan, The tempo and mode of angiosperm mitochondrial genome divergence inferred from intraspecific variation in Arabidopsis thaliana. *G3: Genes, Genomes, Genetics In Press* (2020).
9. M. W. Schmitt *et al.*, Detection of ultra-rare mutations by next-generation sequencing. *Proceedings of the National Academy of Sciences of the United States of America* **109**, 14508-14513 (2012).
10. M. Martin, Cutadapt removes adapter sequences from high-throughput sequencing reads. *EMBnet.journal* **17**, 10-12 (2011).
11. B. Bushnell, J. Rood, E. Singer, BBMerge—accurate paired shotgun read merging via overlap. *PloS One* **12**, e0185056 (2017).
12. D. B. Sloan, Z. Wu, J. Sharbrough, Correction of persistent errors in Arabidopsis reference mitochondrial genomes. *Plant Cell* **30**, 525-527 (2018).
13. E. Hazkani-Covo, R. M. Zeller, W. Martin, Molecular poltergeists: mitochondrial DNA copies (numts) in sequenced nuclear genomes. *PLoS Genetics* **6**, e1000834 (2010).
14. R. M. Stupar *et al.*, Complex mtDNA constitutes an approximate 620-kb insertion on Arabidopsis thaliana chromosome 2: implication of potential sequencing errors caused by large-unit repeats. *Proceedings of the National Academy of Sciences of the United States of America* **98**, 5099-5103 (2001).
15. M. Kokot, M. Długosz, S. Deorowicz, KMC 3: counting and manipulating k-mer statistics. *Bioinformatics* **33**, 2759-2761 (2017).
16. V. Shedge, M. Arrieta-Montiel, A. C. Christensen, S. A. Mackenzie, Plant mitochondrial recombination surveillance requires unusual RecA and MutS homologs. *Plant Cell* **19**, 1251-1264 (2007).
17. M. Miller-Messmer *et al.*, RecA-dependent DNA repair results in increased heteroplasmy of the Arabidopsis mitochondrial genome. *Plant Physiology* **159**, 211-226 (2012).
18. M. P. Arrieta-Montiel, V. Shedge, J. Davila, A. C. Christensen, S. A. Mackenzie, Diversity of the Arabidopsis mitochondrial genome occurs via nuclear-controlled recombination activity. *Genetics* **183**, 1261-1268 (2009).
19. S. Temnykh *et al.*, Computational and experimental analysis of microsatellites in rice (*Oryza sativa* L.): frequency, length variation, transposon associations, and genetic marker potential. *Genome Research* **11**, 1441-1452 (2001).
20. I.-M. A. Chen *et al.*, IMG/M v. 5.0: an integrated data management and comparative analysis system for microbial genomes and microbiomes. *Nucleic Acids Research* **47**, D666-D677 (2019).

21. D. Paez-Espino *et al.*, IMG/VR v. 2.0: an integrated data management and analysis system for cultivated and environmental viral genomes. *Nucleic Acids Research* **47**, D678-D686 (2019).
22. K. Katoh, D. M. Standley, MAFFT multiple sequence alignment software version 7: improvements in performance and usability. *Molecular biology and evolution* **30**, 772-780 (2013).
23. F. Abascal, R. Zardoya, D. Posada, ProtTest: selection of best-fit models of protein evolution. *Bioinformatics* **21**, 2104-2105 (2005).
24. S. Guindon *et al.*, New algorithms and methods to estimate maximum-likelihood phylogenies: assessing the performance of PhyML 3.0. *Systematic Biology* **59**, 307-321 (2010).
25. R. V. Abdelnoor *et al.*, Substoichiometric shifting in the plant mitochondrial genome is influenced by a gene homologous to MutS. *Proceedings of the National Academy of Sciences* **100**, 5968-5973 (2003).
26. J. S. Parent, E. Lepage, N. Brisson, Divergent roles for the two Poll-like organelle DNA polymerases of Arabidopsis. *Plant Physiology* **156**, 254-262 (2011).
27. D. Córdoba-Cañero, E. Dubois, R. R. Ariza, M. P. Doutriaux, T. Roldan-Arjona, Arabidopsis uracil DNA glycosylase (UNG) is required for base excision repair of uracil and increases plant sensitivity to 5-fluorouracil. *Journal of Biological Chemistry* **285**, 7475-7483 (2010).
28. J. J. A. Armenteros *et al.*, Detecting sequence signals in targeting peptides using deep learning. *Life Science Alliance* **2**, e201900429 (2019).
29. J. D. Cupp, B. L. Nielsen, Arabidopsis thaliana organellar DNA polymerase IB mutants exhibit reduced mtDNA levels with a decrease in mitochondrial area density. *Physiologia Plantarum* **149**, 91-103 (2013).
30. T. Czechowski, M. Stitt, T. Altmann, M. K. Udvardi, W.-R. Scheible, Genome-wide identification and testing of superior reference genes for transcript normalization in Arabidopsis. *Plant Physiology* **139**, 5-17 (2005).
